# Supplementary material for: Naive stem cell blastocyst model captures human embryo lineage segregation
Source: PubMed Central journal article supplement (PMC8189436; doi:10.1016/j.stem.2021.04.031), 2021-06-03

**Cell Stem Cell, Volume 28**

**Supplemental Information**

**Naive stem cell blastocyst model**

**captures human embryo lineage segregation**

**Ayaka Yanagida, Daniel Spindlow, Jennifer Nichols, Anish Dattani, Austin Smith, and Ge Guo**

## SUPPLEMENTAL INFORMATION INDEX

Figure S1. Formation of human blastocyst models (blastoids), relates to Figure 1

Figure S2. Single cell transcriptome analyses, relates to Figure 2

Figure S3. Single cell transcriptome analysis of previously reported blastoids, relates to Figure 2

## SUPPLEMENTAL LEGENDS

### Figure S1. Formation of model human blastocysts (blastoids), relates to Figure 1

- A. Images of day 3 HNES1-*GATA3:mKO2* cysts formed from initial cell numbers of 100 or 125. Images were taken from a continuous area of a 96 well plate to represent the range of morphologies.
- B. Images of disorganized, aggregate, single cyst or multiple cyst structures on day 3.
- C. Quantification of structures on day 3.
- D. Images of day 3 cysts with no ICM (left, *GATA3+*), no hypoblast (middle, *GATA3+*, *KLF17+*), and with three lineages (right, *KLF17+*, *GATA4+*, *GATA3+*).
- E. Pie chart of lineage marker expression in day 3 blastoids.
- F. Quantification of the number of *KLF17* or *GATA4* positive inner cells in blastoids.
- G. Images of day 3 niPSC\_HDF75 blastoids in contiguous wells. Initial cell number seeded was 150.
- H. Immunofluorescence staining for *OTX2* in day 3 HNES1mKO2 blastoid.
- I. Z-projections of day 3 blastoids formed from reset cR-Shef6 naïve cells
- J. Z-projections of day 4 blastoids formed from niPSC\_HDF75 naïve cells. All scale bars are 50  $\mu\text{m}$ .

### Figure S2. Single cell transcriptome analysis, relates to Figure 2

- A. t-distributed stochastic neighbour embedding (tSNE) analysis of blastoids coloured to show marker-based cell lineage assignment. EPI, epiblast; Hyp, hypoblast; TE, trophectoderm; intermediate, cells without clear signature
- B. tSNE analysis of human embryos.
- C. tSNE plot in B coloured to show averaged expression scores of gene sets enriched in human embryo lineages (Petropoulos et al., Cell, 2016): EPI, epiblast (E6/7); Hyp hypoblast (E6/7); TE, trophectoderm (E6/7); ICM (E5).
- D. Integrated tSNE of blastoids and embryos
- E. Expression (FPKM) of selected lineage markers in integrated tSNE plots.

### Figure S3. Single cell transcriptome analysis, relates to Figure 2

scRNA-seq data from (Yu et al., 2021) and (Liu et al., 2021) were downloaded and analysed as in Figure 2 and Figure S2.

- A. tSNE analysis of day 9 blastoid data from Yu et al. (2021) coloured to show averaged expression scores of embryo lineage classifiers.
- B. Expression (FPKM) of selected lineage markers in samples from Yu et al. (2021).
- C. tSNE analysis of induced blastoid data from Liu et al. (2021) coloured to show averaged expression scores of embryo lineage classifiers.
- D. Expression (FPKM) of selected lineage markers in samples from Liu et al. (2021)

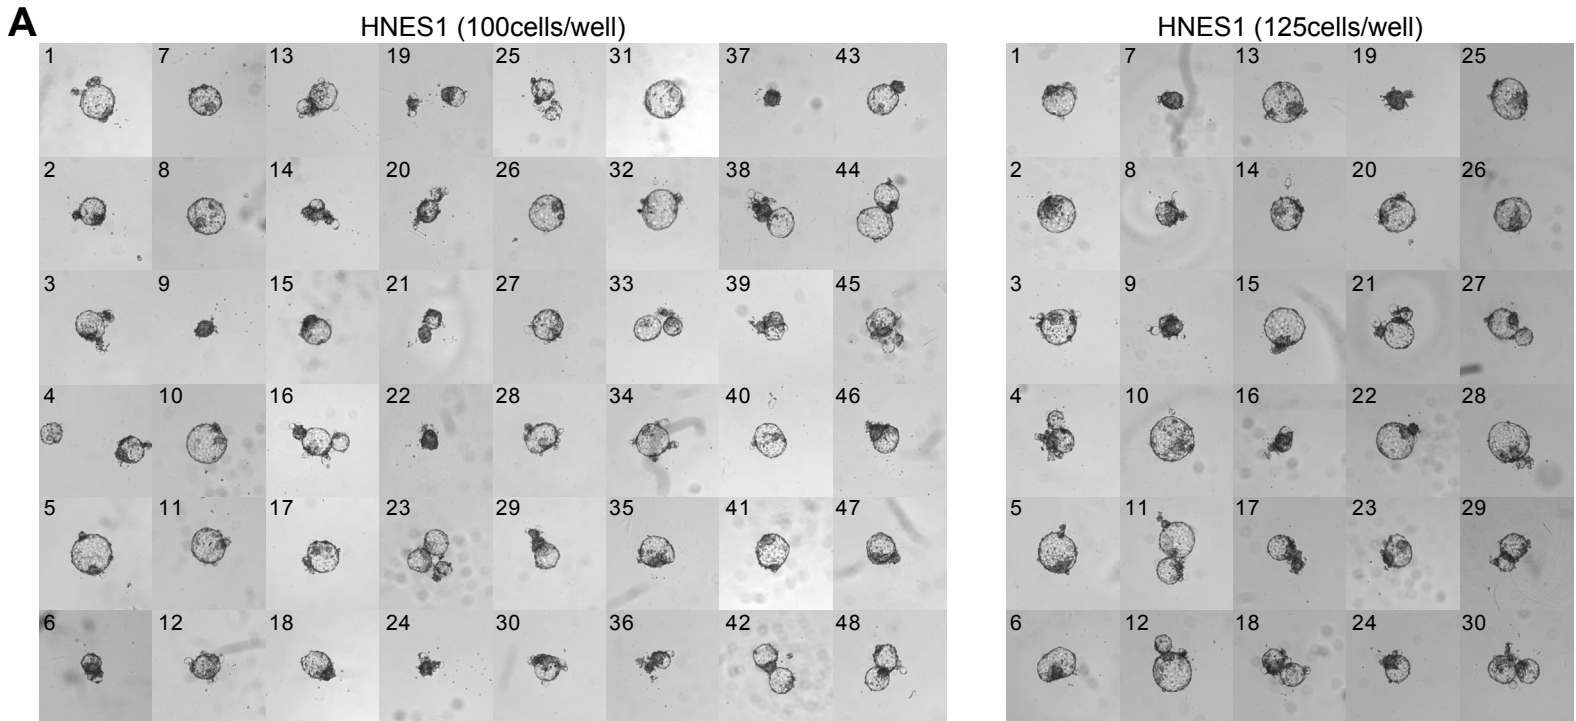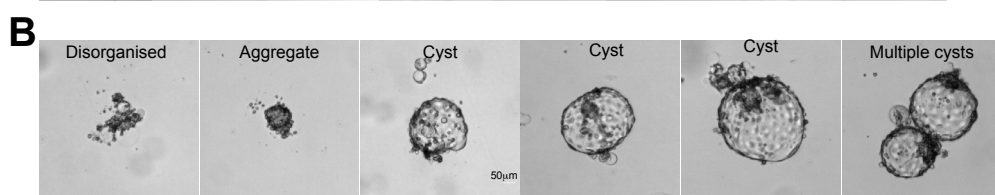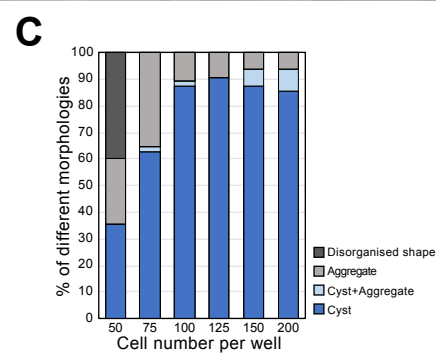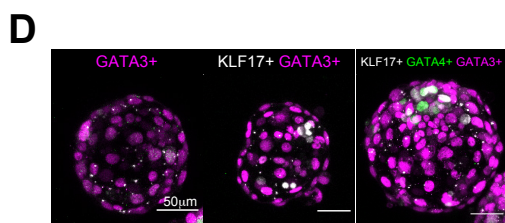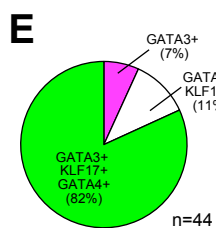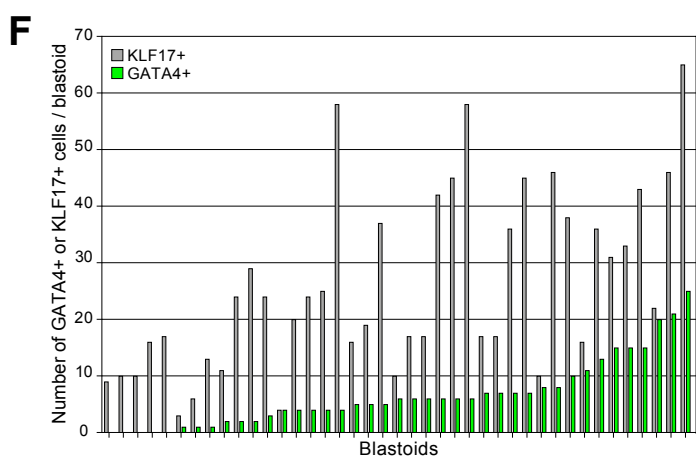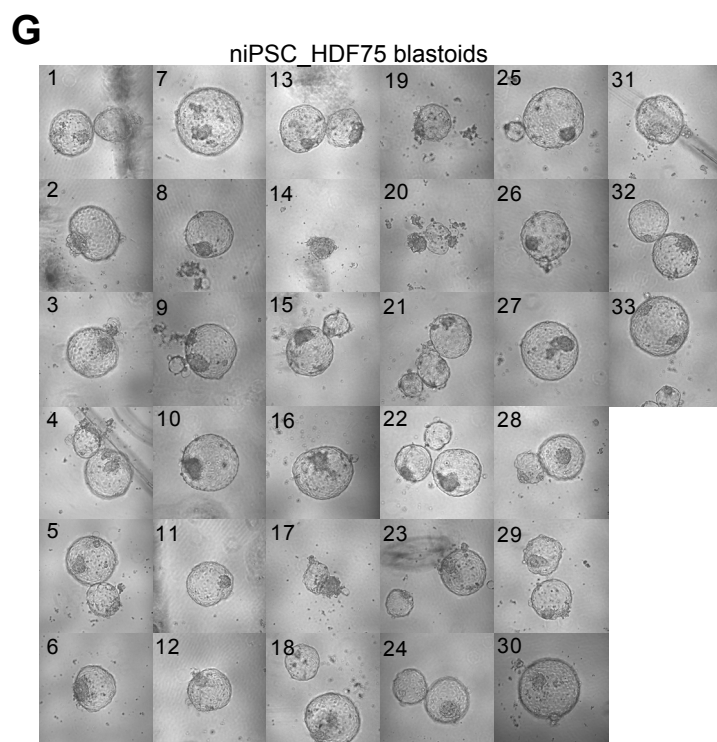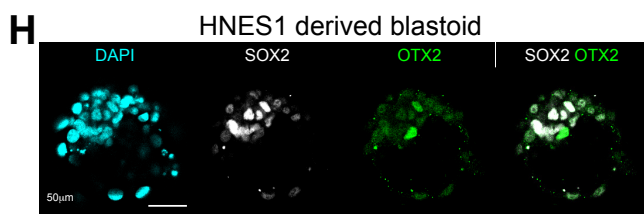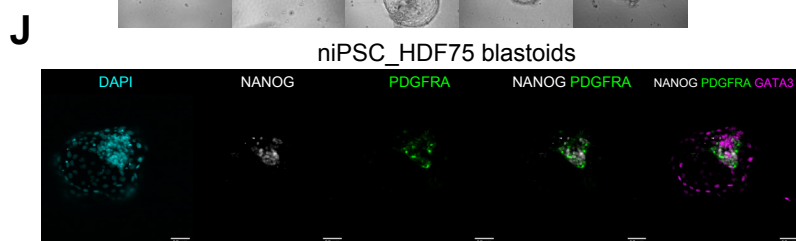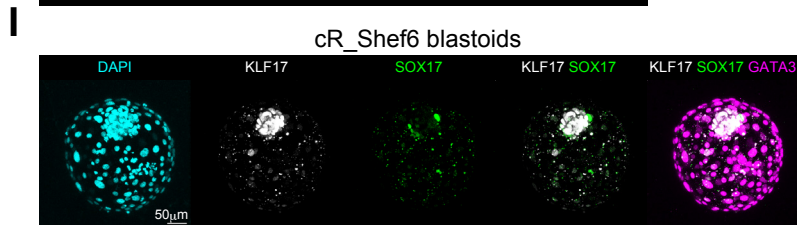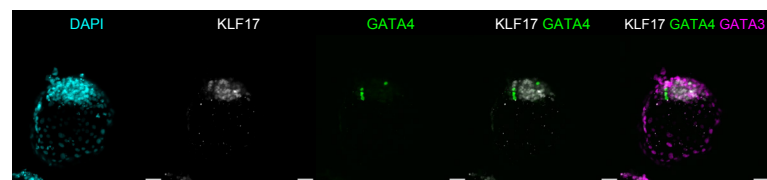

**A**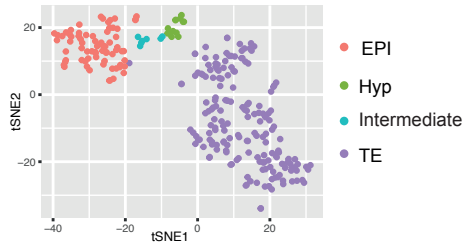**B**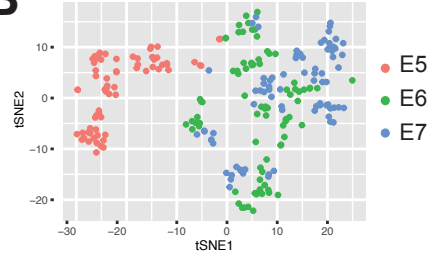**C**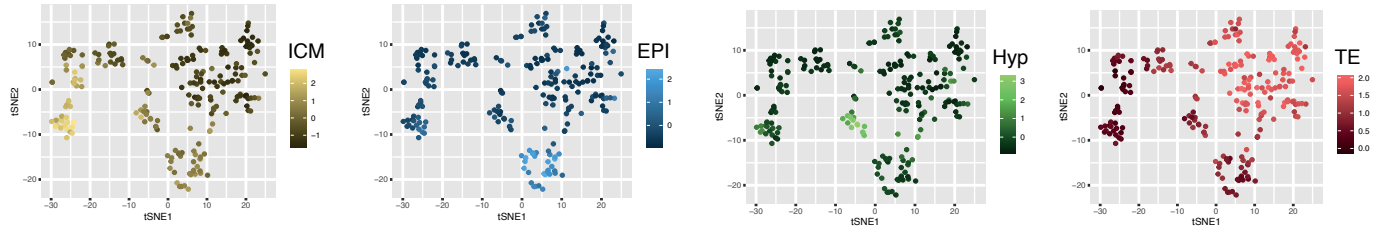**D**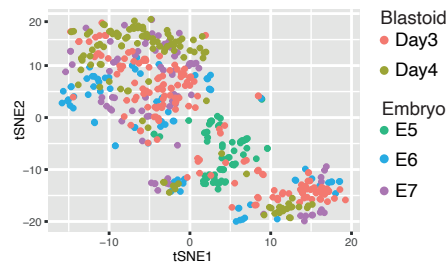**E**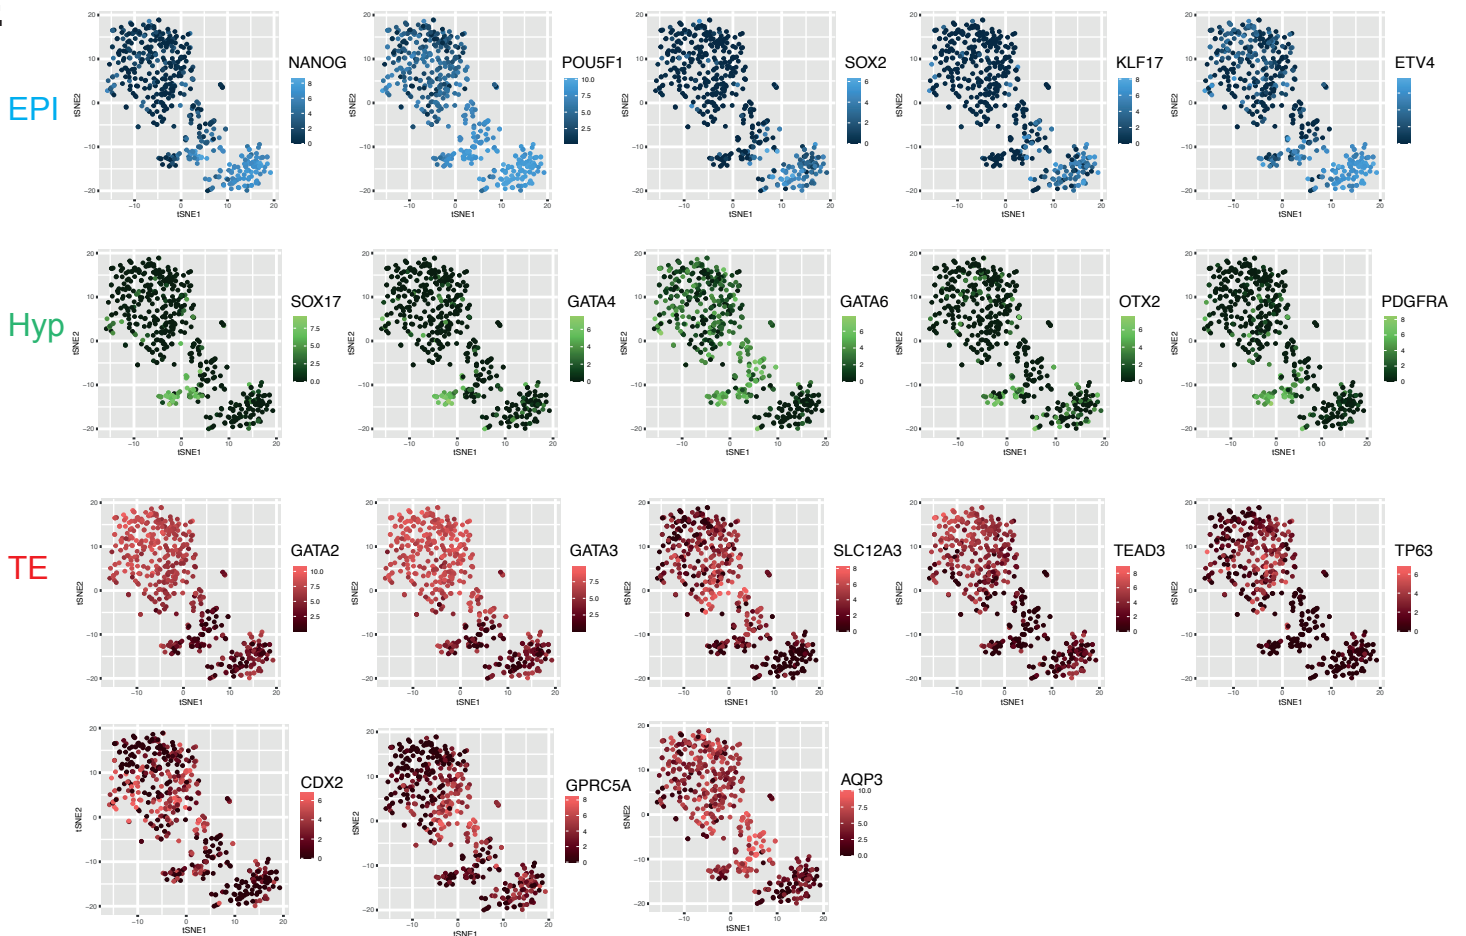

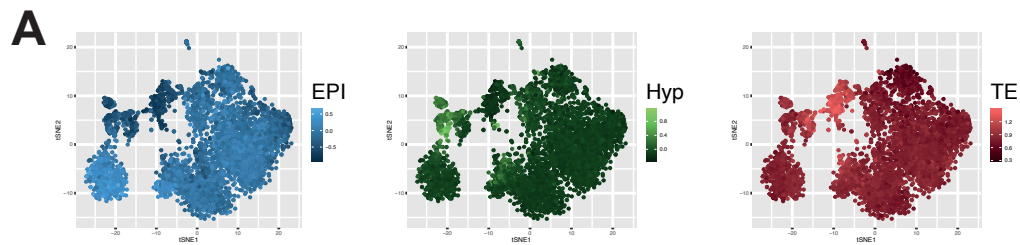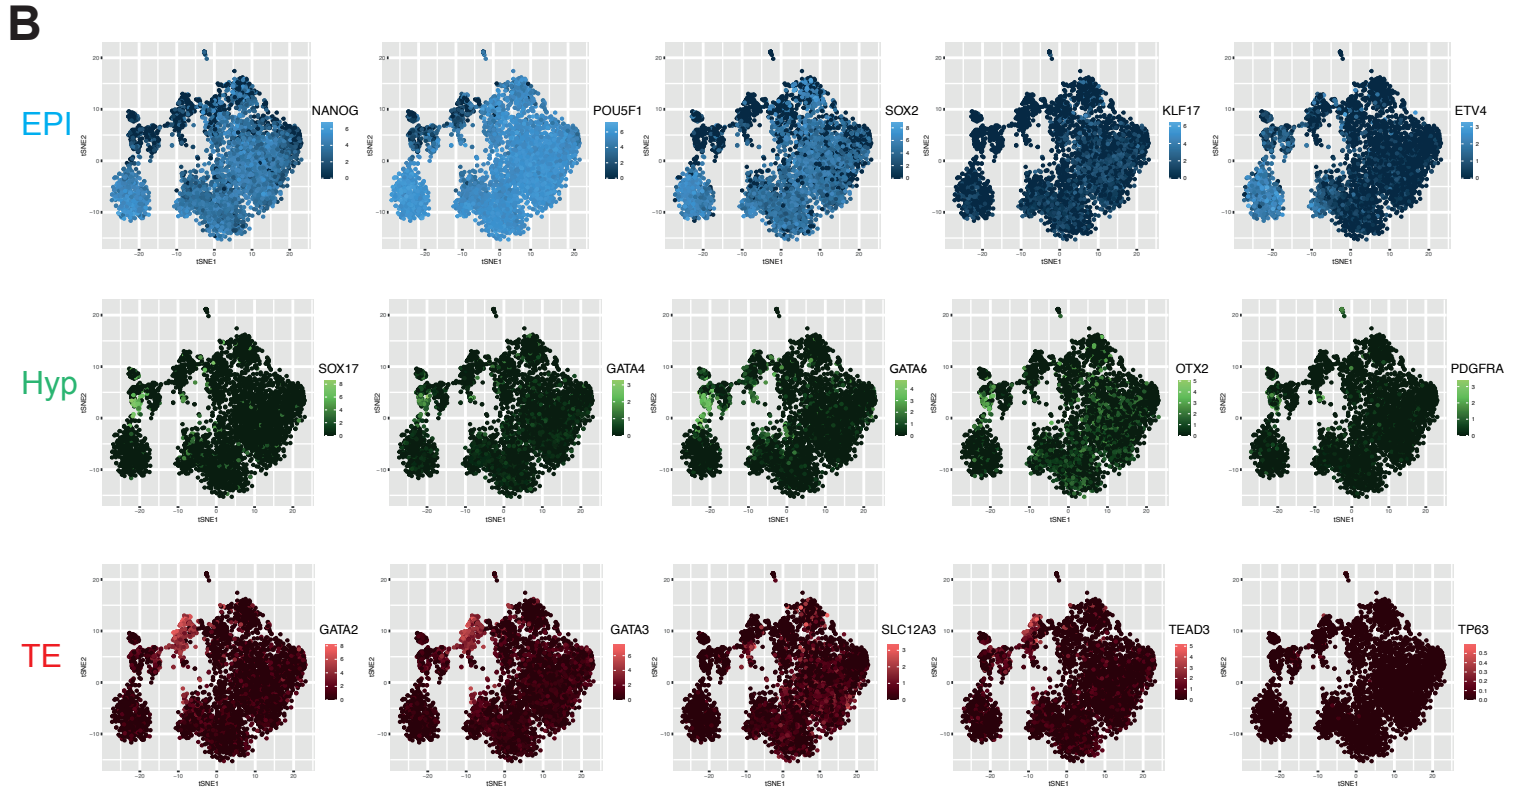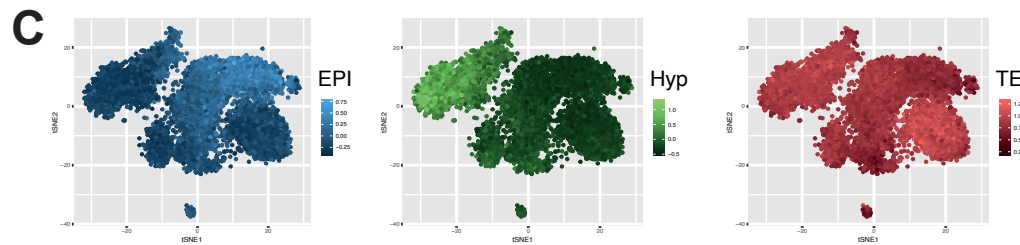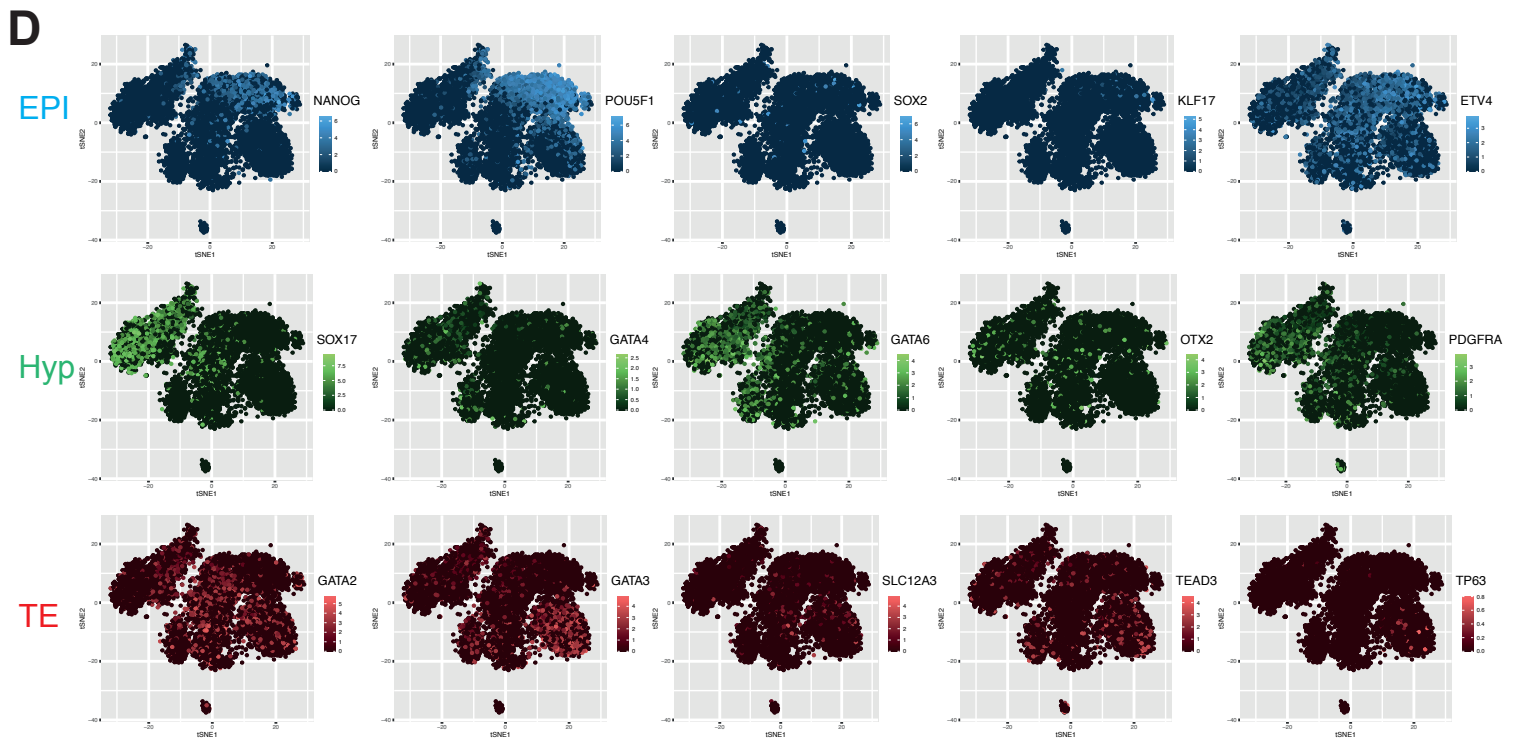

Supplement: mmc1.pdf [file mmc1.pdf]
